# Supplementary material for: Prescribed medicine use and extent of off‐label use according to age in a nationwide sample of Australian children
Source: PubMed Central journal article supplement (PMC9540111; doi:10.1111/ppe.12870), 2022-02-16

## **Supplemental Tables**

**eTable 1.** Characteristics of study population using alternate age categories, 2013-2017

|              | <b>No. children with<br/>≥1 dispensings</b> | <b>Child-years</b> | <b>Dispensings</b> | <b>Dispensings<br/>per child-year</b> |
|--------------|---------------------------------------------|--------------------|--------------------|---------------------------------------|
| <b>Total</b> | 840,190                                     | 4,026,231          | 8,219,722          | 2.0                                   |
| <b>Age</b>   |                                             |                    |                    |                                       |
| <2 years     | 209,125                                     | 466,529            | 995,716            | 2.1                                   |
| 2-5 years    | 303,084                                     | 932,305            | 1,951,555          | 2.1                                   |
| 6-11 years   | 332,607                                     | 1,340,014          | 2,398,899          | 1.8                                   |
| 12-17 years  | 323,085                                     | 1,281,384          | 2,904,068          | 2.3                                   |

**eTable 2.** Prevalence by World Health Organisation Anatomic Therapeutical Chemical (ATC) chemical subgroup, restricted to subgroups with an average yearly prevalence  $\geq 1$  per 1000 children, 2013-17

| ATC Classification                                                  | Most common examples of medicines in subgroup   | Average yearly prevalence per 1000 children |      |      |       |            | Prescribed by specialist, % | Dispensings per child in first year of observed use <sup>a</sup> |      |
|---------------------------------------------------------------------|-------------------------------------------------|---------------------------------------------|------|------|-------|------------|-----------------------------|------------------------------------------------------------------|------|
|                                                                     |                                                 | <1                                          | 1-5  | 6-11 | 12-17 | All (0-17) |                             | Two or more, %                                                   | Mean |
| <b>A – Alimentary Tract</b>                                         |                                                 |                                             |      |      |       |            |                             |                                                                  |      |
| A01A – Stomatological preparations                                  | nystatin, amphotericin b                        | 13.0                                        | 2.8  | 0.9  | 1.2   | 2.3        | 2.2                         | 15.2                                                             | 1.2  |
| A02B – Drugs for peptic ulcer and gastro-oesophageal reflux disease | omeprazole, esomeprazole                        | 47.0                                        | 4.9  | 7.8  | 19.3  | 13.0       | 18.1                        | 35.8                                                             | 2.2  |
| A03F – Propulsives                                                  | metoclopramide, domperidone                     | 0.3                                         | 0.4  | 1.5  | 12.5  | 4.7        | 4.1                         | 11.6                                                             | 1.2  |
| A04A – Antiemetics and antinauseants                                | ondansetron, prochlorperazine <sup>b</sup>      | 3.6                                         | 12.7 | 9.5  | 9.9   | 10.4       | 4.0                         | 10.7                                                             | 1.2  |
| A06A – Drugs for constipation                                       | macrogol, lactulose                             | 2.7                                         | 3.3  | 3.7  | 3.1   | 3.4        | 23.1                        | 28.2                                                             | 2.0  |
| A10A – Insulins and analogues                                       | insulin aspart, insulin glargine                | 0.0                                         | 0.5  | 1.8  | 4.0   | 2.1        | 46.0                        | 96.3                                                             | 4.7  |
| <b>B – Blood</b>                                                    |                                                 |                                             |      |      |       |            |                             |                                                                  |      |
| B03A – Iron preparations                                            | ferrous sulfate, ferrous fumarate               | 3.2                                         | 3.8  | 1.6  | 4.0   | 3.1        | 16.9                        | 26.1                                                             | 1.5  |
| <b>C – Cardiovascular</b>                                           |                                                 |                                             |      |      |       |            |                             |                                                                  |      |
| C01C – Cardiac stimulants excluding cardiac glycosides              | epinephrine                                     | 2.6                                         | 9.8  | 13.1 | 9.4   | 10.7       | 21.6                        | 33.7                                                             | 1.4  |
| C02A – Antiadrenergic agents, centrally acting                      | clonidine                                       | 0.0                                         | 1.3  | 6.4  | 4.9   | 4.2        | 66.3                        | 72.5                                                             | 3.7  |
| C07A – Beta blocking agents                                         | propranolol, atenolol                           | 0.7                                         | 0.3  | 0.6  | 2.8   | 1.3        | 30.9                        | 49.0                                                             | 3.0  |
| <b>D – Dermatologicals</b>                                          |                                                 |                                             |      |      |       |            |                             |                                                                  |      |
| D06B – Chemotherapeutics for topical use                            | silver sulfadiazine                             | 1.1                                         | 1.6  | 1.2  | 1.7   | 1.5        | 1.1                         | 4.4                                                              | 1.1  |
| D07A – Corticosteroids, plain                                       | methylprednisolone, mometasone                  | 131.4                                       | 88.4 | 53.3 | 51.0  | 68.8       | 7.4                         | 29.3                                                             | 1.6  |
| D10A – Anti-acne preparations for topical use                       | adapalene + benzoyl peroxide                    | 0.0                                         | 0.0  | 0.8  | 24.3  | 8.1        | 12.6                        | 44.3                                                             | 2.0  |
| D10B – Anti-acne preparations for systemic use                      | isotretinoin                                    | 0.0                                         | 0.0  | 0.1  | 12.3  | 4.0        | 95.2                        | 92.0                                                             | 5.2  |
| D11A – Other dermatological preparations                            | pimecrolimus                                    | 9.0                                         | 3.8  | 1.8  | 1.6   | 2.8        | 13.5                        | 24.5                                                             | 1.3  |
| <b>G – Genitourinary And Sex Hormones</b>                           |                                                 |                                             |      |      |       |            |                             |                                                                  |      |
| G03A – Hormonal contraceptives for systemic use                     | levonorgestrel + ethinylestradiol, etonogestrel | 0.2                                         | 0.2  | 0.4  | 63.1  | 20.5       | 2.7                         | 72.4                                                             | 2.8  |
| <b>H – Systemic Hormones</b>                                        |                                                 |                                             |      |      |       |            |                             |                                                                  |      |
| H01B – Posterior pituitary lobe hormones                            | desmopressin                                    | 0.0                                         | 0.1  | 4.6  | 2.6   | 2.5        | 23.8                        | 70.9                                                             | 4.5  |

| ATC Classification                                               | Most common examples of medicines in subgroup | Average yearly prevalence per 1000 children |       |       |       |            | Prescribed by specialist, % | Dispensings per child in first year of observed use <sup>a</sup> |      |
|------------------------------------------------------------------|-----------------------------------------------|---------------------------------------------|-------|-------|-------|------------|-----------------------------|------------------------------------------------------------------|------|
|                                                                  |                                               | <1                                          | 1-5   | 6-11  | 12-17 | All (0-17) |                             | Two or more, %                                                   | Mean |
| H02A – Corticosteroids for systemic use, plain                   | prednisolone, prednisone                      | 134.2                                       | 164.1 | 73.3  | 33.4  | 92.7       | 3.6                         | 32.4                                                             | 1.6  |
| H03A – Thyroid preparations                                      | levothyroxine                                 | 0.8                                         | 0.7   | 1.0   | 2.3   | 1.4        | 39.4                        | 73.8                                                             | 2.3  |
| H04A – Glycogenolytic hormones                                   | glucagon hydrochloride                        | 0.1                                         | 0.3   | 1.1   | 2.1   | 1.2        | 49.5                        | 49.1                                                             | 1.7  |
| <b>J – Systemic Antiinfectives</b>                               |                                               |                                             |       |       |       |            |                             |                                                                  |      |
| J01A – Tetracyclines                                             | doxycycline, minocycline                      | 0.1                                         | 0.2   | 1.4   | 53.3  | 17.7       | 8.2                         | 65.7                                                             | 3.9  |
| J01C – Beta-lactam antibacterials, penicillins                   | amoxicillin, amoxicillin + clavulanic acid    | 358.3                                       | 428.5 | 256.3 | 217.1 | 307.4      | 2.1                         | 53.1                                                             | 2.1  |
| J01D – Other beta-lactam antibacterials                          | cefalexin, cefaclor                           | 100.4                                       | 180.7 | 123.2 | 110.9 | 138.2      | 2.6                         | 38.9                                                             | 1.7  |
| J01E – Sulfonamides and trimethoprim                             | trimethoprim + sulfamethoxazole, trimethoprim | 18.4                                        | 23.9  | 13.4  | 15.6  | 17.8       | 7.0                         | 29.8                                                             | 1.6  |
| J01F – Macrolides, lincosamides and streptogramins               | erythromycin,, roxithromycin                  | 47.8                                        | 81.7  | 55.6  | 66.7  | 68.1       | 2.5                         | 34.3                                                             | 1.6  |
| J01X – Other antibacterials                                      | metronidazole, tinidazole                     | 2.7                                         | 8.0   | 7.2   | 10.0  | 8.3        | 6.4                         | 15.7                                                             | 1.2  |
| J05A – Direct acting antivirals                                  | famciclovir, valaciclovir                     | 0.1                                         | 0.2   | 0.6   | 2.5   | 1.1        | 7.3                         | 15.0                                                             | 1.2  |
| <b>M – Musculoskeletal</b>                                       |                                               |                                             |       |       |       |            |                             |                                                                  |      |
| M01A – Antiinflammatory and antirheumatic products, non-steroids | ibuprofen, mefenamic acid                     | 0.1                                         | 0.6   | 1.7   | 27.6  | 9.7        | 17.6                        | 20.1                                                             | 1.4  |
| <b>N – Nervous System</b>                                        |                                               |                                             |       |       |       |            |                             |                                                                  |      |
| N02A – Opioids                                                   | paracetamol + codeine, oxycodone              | 0.5                                         | 2.9   | 3.5   | 35.7  | 13.6       | 30.0                        | 22.1                                                             | 1.4  |
| N02B – Other analgesics and antipyretics                         | paracetamol, pregabalin <sup>b</sup>          | 5.1                                         | 5.6   | 4.4   | 4.3   | 4.9        | 7.1                         | 25.5                                                             | 1.6  |
| N02C – Antimigraine preparations                                 | sumatriptan, pizotifen                        | 0.0                                         | 0.3   | 1.2   | 5.2   | 2.2        | 20.1                        | 41.5                                                             | 2.2  |
| N03A – Antiepileptics                                            | valproate, lamotrigine                        | 1.2                                         | 2.3   | 4.2   | 6.7   | 4.4        | 43.4                        | 83.7                                                             | 8.8  |
| N05A – Antipsychotics                                            | risperidone, quetiapine                       | 0.0                                         | 0.7   | 4.2   | 7.8   | 4.2        | 54.8                        | 79.2                                                             | 5.8  |
| N05B – Anxiolytics                                               | diazepam, oxazepam                            | 0.1                                         | 0.2   | 0.6   | 4.0   | 1.6        | 15.3                        | 21.9                                                             | 1.6  |
| N06A – Antidepressants                                           | fluoxetine, sertraline                        | 0.2                                         | 0.8   | 6.9   | 40.3  | 15.6       | 33.2                        | 80.6                                                             | 6.8  |
| N06B – Psychostimulants, agents used for ADHD and nootropics     | methylphenidate, lisdexamfetamine             | 0.0                                         | 1.9   | 27.0  | 24.0  | 17.7       | 83.9                        | 91.1                                                             | 7.5  |
| <b>P – Antiparasitics</b>                                        |                                               |                                             |       |       |       |            |                             |                                                                  |      |
| P03A – Ectoparasiticides, including scabicides                   | permethrin                                    | 2.4                                         | 3.1   | 3.0   | 3.8   | 3.4        | 1.6                         | 37.9                                                             | 1.5  |
| <b>R – Respiratory</b>                                           |                                               |                                             |       |       |       |            |                             |                                                                  |      |

| ATC Classification                                                  | Most common examples of medicines in subgroup                    | Average yearly prevalence per 1000 children |      |      |       |            | Prescribed by specialist, % | Dispensings per child in first year of observed use <sup>a</sup> |      |
|---------------------------------------------------------------------|------------------------------------------------------------------|---------------------------------------------|------|------|-------|------------|-----------------------------|------------------------------------------------------------------|------|
|                                                                     |                                                                  | <1                                          | 1-5  | 6-11 | 12-17 | All (0-17) |                             | Two or more, %                                                   | Mean |
| R03A – Adrenergics, inhalants                                       | salbutamol, fluticasone + salmeterol                             | 33.6                                        | 78.4 | 71.0 | 59.4  | 69.2       | 3.1                         | 36.1                                                             | 1.9  |
| R03B – Other drugs for obstructive airway diseases, inhalants       | fluticasone, ipratropium                                         | 6.9                                         | 43.4 | 40.7 | 15.8  | 32.6       | 7.1                         | 48.5                                                             | 2.2  |
| R03C – Adrenergics for systemic use                                 | salbutamol                                                       | 5.6                                         | 5.7  | 1.4  | 0.3   | 2.6        | 0.5                         | 14.8                                                             | 1.2  |
| R03D – Other systemic drugs for obstructive airway disease          | montelukast, theophylline                                        | 0.2                                         | 13.8 | 14.1 | 4.0   | 10.3       | 10.5                        | 65.8                                                             | 4.4  |
| <b>S – Sensory Organs</b>                                           |                                                                  |                                             |      |      |       |            |                             |                                                                  |      |
| S01A – Ophthalmological antiinfectives                              | chloramphenicol, tobramycin                                      | 78.1                                        | 44.8 | 16.0 | 12.3  | 27.6       | 2.3                         | 18.7                                                             | 1.2  |
| S01B – Ophthalmological antiinflammatory agents                     | hydrocortisone acetate, fluorometholone                          | 2.3                                         | 3.2  | 4.2  | 4.5   | 4.0        | 29.2                        | 19.2                                                             | 1.5  |
| S02A – Otological antiinfectives                                    | ciprofloxacin, chloramphenicol framycetin sulfate + gramicidin + | 1.4                                         | 3.0  | 1.5  | 0.6   | 1.7        | 10.5                        | 26.0                                                             | 1.4  |
| S02C – Otological corticosteroids and antiinfectives in combination | dexamethasone, triamcinolone + neomycin + gramicidin + nystatin  | 21.2                                        | 32.2 | 34.8 | 25.1  | 31.0       | 2.8                         | 16.8                                                             | 1.2  |
| S03A – Ophthalmological and otological antiinfectives               | framycetin sulfate                                               | 9.6                                         | 5.4  | 2.2  | 1.4   | 3.4        | 2.5                         | 9.5                                                              | 1.1  |

<sup>a</sup>Restricted to children with a first dispensing in 2013-2016

<sup>b</sup>The Australian Pharmaceutical Benefits Scheme classifies prochlorperazine as an antiemetic (not antipsychotic) and pregabalin as an analgesic (not antiepileptic)

**eTable 3.** Prevalence by WHO ATC therapeutic subgroup using alternate age categories, restricted to subgroups with an average yearly prevalence  $\geq 1$  per 1000 children, 2013-17

| Therapeutic subgroup                                           | Most common examples of medicines in subgroup   | Average yearly prevalence per 1000 children |       |       |       |            |
|----------------------------------------------------------------|-------------------------------------------------|---------------------------------------------|-------|-------|-------|------------|
|                                                                |                                                 | <2                                          | 2-5   | 6-11  | 12-17 | All (0-17) |
| <b>A – Alimentary Tract</b>                                    |                                                 |                                             |       |       |       |            |
| A01 – Stomatological Preparations                              | nystatin, amphotericin B                        | 9.3                                         | 2.0   | 0.9   | 1.2   | 2.3        |
| A02 – Acid Related Disorders                                   | omeprazole, esomeprazole                        | 26.0                                        | 4.4   | 8.0   | 19.3  | 13.1       |
| A03 – Functional Gastrointestinal Disorders                    | metoclopramide, domperidone                     | 0.3                                         | 0.5   | 1.6   | 12.5  | 4.7        |
| A04 – Antiemetics And Antinauseants                            | ondansetron, prochlorperazine <sup>b</sup>      | 7.7                                         | 13.1  | 9.5   | 9.9   | 10.4       |
| A06 – Constipation                                             | macrogol, lactulose                             | 2.8                                         | 3.5   | 3.7   | 3.1   | 3.4        |
| A07 – Antidiarrheals, Intestinal                               | mesalazine, electrolytes                        | 1.6                                         | 1.1   | 1.1   | 3.3   | 1.9        |
| Antiinflammatory/Antiinfective Agents                          |                                                 |                                             |       |       |       |            |
| A10 – Diabetes                                                 | insulin aspart, metformin                       | 0.1                                         | 0.7   | 2.0   | 5.8   | 2.7        |
| <b>B – Blood</b>                                               |                                                 |                                             |       |       |       |            |
| B03 – Antianaemic Preparations                                 | ferrous sulfate, ferrous fumarate               | 4.1                                         | 3.7   | 1.8   | 5.4   | 3.7        |
| <b>C – Cardiovascular system</b>                               |                                                 |                                             |       |       |       |            |
| C01 – Cardiac Therapy                                          | epinephrine, flecainide                         | 4.7                                         | 10.7  | 13.2  | 9.6   | 10.8       |
| C02 – Antihypertensives                                        | clonidine, prazosin                             | 0.1                                         | 1.7   | 6.4   | 5.0   | 4.2        |
| C07 – Beta Blocking Agents                                     | propranolol, atenolol                           | 0.5                                         | 0.2   | 0.6   | 2.8   | 1.3        |
| <b>D – Dermatologicals</b>                                     |                                                 |                                             |       |       |       |            |
| D01 – Antifungals For Dermatological Use                       | griseofulvin, terbinafine                       | 1.1                                         | 1.3   | 1.3   | 1.7   | 1.4        |
| D06 – Antibiotics And Chemotherapeutics For Dermatological Use | silver sulfadiazine                             | 2.0                                         | 1.3   | 1.2   | 1.7   | 1.5        |
| D07 – Corticosteroids, Dermatological Preparations             | hydrocortisone acetate, methylprednisolone      | 124.7                                       | 80.3  | 53.3  | 51.0  | 68.8       |
| D10 – Anti-Acne Preparations                                   | isoretinoin, adapalene + benzoyl peroxide       | 0.0                                         | 0.1   | 0.8   | 34.7  | 11.5       |
| D11 – Other Dermatological Preparations                        | pimecrolimus                                    | 7.4                                         | 3.2   | 1.8   | 1.6   | 2.8        |
| <b>G – Genitourinary system &amp; sex hormones</b>             |                                                 |                                             |       |       |       |            |
| G03 – Sex Hormones And Modulators Of The Genital System        | levonorgestrel + ethinylestradiol, etonogestrel | 0.7                                         | 0.6   | 0.6   | 65.5  | 21.5       |
| <b>H – Systemic hormones</b>                                   |                                                 |                                             |       |       |       |            |
| H01 – Pituitary And Hypothalamic Hormones And Analogues        | desmopressin, somatropin                        | 0.1                                         | 0.2   | 4.9   | 2.8   | 2.7        |
| H02 – Systemic corticosteroids                                 | prednisolone sodium phosphate, prednisolone     | 169.5                                       | 155.0 | 73.3  | 33.4  | 92.7       |
| H03 – Thyroid Therapy                                          | levothyroxine, carbimazole                      | 0.7                                         | 0.8   | 1.1   | 2.6   | 1.5        |
| H04 – Pancreatic Hormones                                      | glucagon hydrochloride                          | 0.1                                         | 0.4   | 1.1   | 2.1   | 1.2        |
| <b>J – Systemic antiinfectives</b>                             |                                                 |                                             |       |       |       |            |
| J01 – Systemic antibacterials                                  | amoxicillin, cephalixin                         | 520.2                                       | 533.8 | 369.7 | 367.4 | 435.3      |
| J05 – Systemic antivirals                                      | acyclovir, famciclovir                          | 0.1                                         | 0.2   | 0.6   | 2.5   | 1.1        |
| <b>M – Musculoskeletal system</b>                              |                                                 |                                             |       |       |       |            |

| Therapeutic subgroup                               | Most common examples of medicines in subgroup   | Average yearly prevalence per 1000 children |       |      |       |            |
|----------------------------------------------------|-------------------------------------------------|---------------------------------------------|-------|------|-------|------------|
|                                                    |                                                 | <2                                          | 2-5   | 6-11 | 12-17 | All (0-17) |
| M01 – Antiinflammatory and Antirheumatic Products  | ibuprofen, mefenamic acid                       | 0.2                                         | 0.7   | 1.8  | 27.9  | 9.8        |
| <b>N – Nervous system</b>                          |                                                 |                                             |       |      |       |            |
| N02 – Analgesics                                   | paracetamol + codeine, paracetamol              | 6.3                                         | 9.0   | 8.9  | 42.8  | 19.8       |
| N03 – Antiepileptics                               | valproate, lamotrigine                          | 1.4                                         | 2.6   | 4.2  | 6.7   | 4.4        |
| N05 – Psycholeptics                                | risperidone, quetiapine                         | 0.2                                         | 1.1   | 4.8  | 12.8  | 6.1        |
| N06 – Psychoanaleptics                             | methylphenidate, fluoxetine                     | 0.2                                         | 3.2   | 31.7 | 60.1  | 31.2       |
| <b>P – Antiparasitics</b>                          |                                                 |                                             |       |      |       |            |
| P03 – Ectoparasiticides                            | permethrin                                      | 2.9                                         | 3.1   | 3.0  | 3.8   | 3.4        |
| <b>R – Respiratory system</b>                      |                                                 |                                             |       |      |       |            |
| R03 – Obstructive Airway Diseases                  | salbutamol, fluticasone propionate              | 69.3                                        | 114.3 | 97.6 | 69.0  | 91.2       |
| <b>S – Sensory organs</b>                          |                                                 |                                             |       |      |       |            |
| S01 – Ophthalmologicals                            | chloramphenicol, fluorometholone                | 83.1                                        | 39.6  | 21.0 | 17.3  | 32.4       |
| S02 - Otologicals                                  | framycetin sulfate + gramicidin + dexamethasone | 27.0                                        | 35.7  | 36.0 | 25.5  | 32.4       |
| S03 – Ophthalmological and otological preparations | framycetin sulfate                              | 9.6                                         | 4.2   | 2.2  | 1.4   | 3.4        |

<sup>a</sup>Among children with a first observed dispensing in 2013-2016 only

<sup>b</sup>The PBS classifies prochlorperazine as an antiemetic (not antipsychotic)

WHO ATC = World Health Organisation Anatomic Therapeutic Chemical

**eTable 4.** Prevalence by World Health Organisation Anatomic Therapeutical Chemical (ATC) chemical subgroup using alternative age categories, restricted to subgroups with an average yearly prevalence  $\geq 1$  per 1000 children, 2013-17

| ATC Classification                                                  | Most common examples of medicines in subgroup     | Average yearly prevalence per 1000 children |       |       |       |            |
|---------------------------------------------------------------------|---------------------------------------------------|---------------------------------------------|-------|-------|-------|------------|
|                                                                     |                                                   | <2                                          | 2-5   | 6-11  | 12-17 | All (0-17) |
| <b>A – Alimentary Tract</b>                                         |                                                   |                                             |       |       |       |            |
| A01A – Stomatological preparations                                  | nystatin, amphotericin b                          | 9.3                                         | 2.0   | 0.9   | 1.2   | 2.3        |
| A02B – Drugs for peptic ulcer and gastro-oesophageal reflux disease | omeprazole, esomeprazole                          | 25.9                                        | 4.3   | 7.8   | 19.3  | 13.0       |
| A03F – Propulsives                                                  | metoclopramide, domperidone                       | 0.3                                         | 0.5   | 1.5   | 12.5  | 4.7        |
| A04A – Antiemetics and antinauseants                                | ondansetron, prochlorperazine <sup>b</sup>        | 7.7                                         | 13.1  | 9.5   | 9.9   | 10.4       |
| A06A – Drugs for constipation                                       | macrogol, lactulose                               | 2.8                                         | 3.5   | 3.7   | 3.1   | 3.4        |
| A10A – Insulins and analogues                                       | insulin aspart, insulin glargine                  | 0.1                                         | 0.6   | 1.8   | 4.0   | 2.1        |
| <b>B – Blood</b>                                                    |                                                   |                                             |       |       |       |            |
| B03A – Iron preparations                                            | ferrous sulfate, ferrous fumarate                 | 3.9                                         | 3.6   | 1.6   | 4.0   | 3.1        |
| <b>C – Cardiovascular</b>                                           |                                                   |                                             |       |       |       |            |
| C01C – Cardiac stimulants excluding cardiac glycosides              | epinephrine                                       | 4.7                                         | 10.7  | 13.1  | 9.4   | 10.7       |
| C02A – Antiadrenergic agents, centrally acting                      | clonidine                                         | 0.1                                         | 1.7   | 6.4   | 4.9   | 4.2        |
| C07A – Beta blocking agents                                         | propranolol, atenolol                             | 0.5                                         | 0.2   | 0.6   | 2.8   | 1.3        |
| <b>D – Dermatologicals</b>                                          |                                                   |                                             |       |       |       |            |
| D06B – Chemotherapeutics for topical use                            | silver sulfadiazine                               | 2.0                                         | 1.3   | 1.2   | 1.7   | 1.5        |
| D07A – Corticosteroids, plain                                       | methylprednisolone, mometasone                    | 124.7                                       | 80.3  | 53.3  | 51.0  | 68.8       |
| D10A – Anti-acne preparations for topical use                       | adapalene + benzoyl peroxide                      | 0.0                                         | 0.0   | 0.8   | 24.3  | 8.1        |
| D10B – Anti-acne preparations for systemic use                      | isotretinoin                                      | 0.0                                         | 0.0   | 0.1   | 12.3  | 4.0        |
| D11A – Other dermatological preparations                            | pimecrolimus                                      | 7.4                                         | 3.2   | 1.8   | 1.6   | 2.8        |
| <b>G – Genitourinary And Sex Hormones</b>                           |                                                   |                                             |       |       |       |            |
| G03A – Hormonal contraceptives for systemic use                     | levonorgestrel + ethinynelestradiol, etonogestrel | 0.2                                         | 0.2   | 0.4   | 63.1  | 20.5       |
| <b>H – Systemic Hormones</b>                                        |                                                   |                                             |       |       |       |            |
| H01B – Posterior pituitary lobe hormones                            | desmopressin                                      | 0.0                                         | 0.1   | 4.6   | 2.6   | 2.5        |
| H02A – Corticosteroids for systemic use, plain                      | prednisolone, prednisone                          | 169.5                                       | 155.0 | 73.3  | 33.4  | 92.7       |
| H03A – Thyroid preparations                                         | levothyroxine                                     | 0.7                                         | 0.7   | 1.0   | 2.3   | 1.4        |
| H04A – Glycogenolytic hormones                                      | glucagon hydrochloride                            | 0.1                                         | 0.4   | 1.1   | 2.1   | 1.2        |
| <b>J – Systemic Antiinfectives</b>                                  |                                                   |                                             |       |       |       |            |
| J01A – Tetracyclines                                                | doxycycline, minocycline                          | 0.1                                         | 0.2   | 1.4   | 53.3  | 17.7       |
| J01C – Beta-lactam antibacterials, penicillins                      | amoxicillin, amoxicillin + clavulanic acid        | 431.5                                       | 407.3 | 256.3 | 217.1 | 307.4      |

| ATC Classification                                                  | Most common examples of medicines in subgroup                                                     | Average yearly prevalence per 1000 children |       |       |       |            |
|---------------------------------------------------------------------|---------------------------------------------------------------------------------------------------|---------------------------------------------|-------|-------|-------|------------|
|                                                                     |                                                                                                   | <2                                          | 2-5   | 6-11  | 12-17 | All (0-17) |
| J01D – Other beta-lactam antibacterials                             | cefalexin, cefaclor                                                                               | 148.9                                       | 178.1 | 123.2 | 110.9 | 138.2      |
| J01E – Sulfonamides and trimethoprim                                | trimethoprim + sulfamethoxazole, trimethoprim                                                     | 23.3                                        | 22.9  | 13.4  | 15.6  | 17.8       |
| J01F – Macrolides, lincosamides and streptogramins                  | erythromycin, roxithromycin                                                                       | 70.9                                        | 79.2  | 55.6  | 66.7  | 68.1       |
| J01X – Other antibacterials                                         | metronidazole, tinidazole                                                                         | 5.5                                         | 8.0   | 7.2   | 10.0  | 8.3        |
| J05A – Direct acting antivirals                                     | famciclovir, valaciclovir                                                                         | 0.1                                         | 0.2   | 0.6   | 2.5   | 1.1        |
| <b>M – Musculoskeletal</b>                                          |                                                                                                   |                                             |       |       |       |            |
| M01A – Antiinflammatory and antirheumatic products, non-steroids    | ibuprofen, mefenamic acid                                                                         | 0.2                                         | 0.7   | 1.7   | 27.6  | 9.7        |
| <b>N – Nervous System</b>                                           |                                                                                                   |                                             |       |       |       |            |
| N02A – Opioids                                                      | paracetamol + codeine, oxycodone                                                                  | 0.8                                         | 3.3   | 3.5   | 35.7  | 13.6       |
| N02B – Other analgesics and antipyretics                            | paracetamol, pregabalin <sup>b</sup>                                                              | 5.4                                         | 5.5   | 4.4   | 4.3   | 4.9        |
| N02C – Antimigraine preparations                                    | sumatriptan, pizotifen                                                                            | 0.1                                         | 0.3   | 1.2   | 5.2   | 2.2        |
| N03A – Antiepileptics                                               | valproate, lamotrigine                                                                            | 1.4                                         | 2.6   | 4.2   | 6.7   | 4.4        |
| N05A – Antipsychotics                                               | risperidone, quetiapine                                                                           | 0.0                                         | 0.8   | 4.2   | 7.8   | 4.2        |
| N05B – Anxiolytics                                                  | diazepam, oxazepam                                                                                | 0.1                                         | 0.2   | 0.6   | 4.0   | 1.6        |
| N06A – Antidepressants                                              | fluoxetine, sertraline                                                                            | 0.2                                         | 1.0   | 6.9   | 40.3  | 15.6       |
| N06B – Psychostimulants, agents used for ADHD and nootropics        | methylphenidate, lisdexamfetamine                                                                 | 0.0                                         | 2.3   | 27.0  | 24.0  | 17.7       |
| <b>P – Antiparasitics</b>                                           |                                                                                                   |                                             |       |       |       |            |
| P03A – Ectoparasiticides, including scabicides                      | permethrin                                                                                        | 2.9                                         | 3.1   | 3.0   | 3.8   | 3.4        |
| <b>R – Respiratory</b>                                              |                                                                                                   |                                             |       |       |       |            |
| R03A – Adrenergics, inhalants                                       | salbutamol, fluticasone + salmeterol                                                              | 54.4                                        | 80.1  | 71.0  | 59.4  | 69.2       |
| R03B – Other drugs for obstructive airway diseases, inhalants       | fluticasone, ipratropium                                                                          | 17.8                                        | 48.3  | 40.7  | 15.8  | 32.6       |
| R03C – Adrenergics for systemic use                                 | salbutamol                                                                                        | 7.4                                         | 4.9   | 1.4   | 0.3   | 2.6        |
| R03D – Other systemic drugs for obstructive airway disease          | montelukast, theophylline                                                                         | 1.1                                         | 16.9  | 14.1  | 4.0   | 10.3       |
| <b>S – Sensory Organs</b>                                           |                                                                                                   |                                             |       |       |       |            |
| S01A – Ophthalmological antiinfectives                              | chloramphenicol, tobramycin                                                                       | 79.5                                        | 35.3  | 16.0  | 12.3  | 27.6       |
| S01B – Ophthalmological antiinflammatory agents                     | hydrocortisone acetate, fluorometholone                                                           | 2.5                                         | 3.3   | 4.2   | 4.5   | 4.0        |
| S02A – Otological antiinfectives                                    | ciprofloxacin, chloramphenicol                                                                    | 2.5                                         | 2.9   | 1.5   | 0.6   | 1.7        |
| S02C – Otological corticosteroids and antiinfectives in combination | framycetin sulfate + gramicidin + dexamethasone, triamcinolone + neomycin + gramicidin + nystatin | 24.9                                        | 33.2  | 34.8  | 25.1  | 31.0       |



| <b>ATC Classification</b>                             | <b>Most common examples of medicines in subgroup</b> | <b>Average yearly prevalence per 1000 children</b> |            |             |              |                   |
|-------------------------------------------------------|------------------------------------------------------|----------------------------------------------------|------------|-------------|--------------|-------------------|
|                                                       |                                                      | <b>&lt;2</b>                                       | <b>2-5</b> | <b>6-11</b> | <b>12-17</b> | <b>All (0-17)</b> |
| S03A – Ophthalmological and otological antiinfectives | framycetin sulfate                                   | 9.6                                                | 4.2        | 2.2         | 1.4          | 3.4               |

<sup>a</sup>Restricted to children with a first dispensing in 2013-2016

<sup>b</sup>The Australian Pharmaceutical Benefits Scheme classifies prochlorperazine as an antiemetic (not antipsychotic) and pregabalin as an analgesic (not antiepileptic)

**eTable 5.** On-label and off-label dispensing rate in children by age using alternate age categories, 2013-17

| Age group   | On-label                         |                             | Off-label by age at dispensing   |                             |                                                                   |
|-------------|----------------------------------|-----------------------------|----------------------------------|-----------------------------|-------------------------------------------------------------------|
|             | Dispensings per 1000 child-years | Prescribed by specialist, % | Dispensings per 1000 child-years | Prescribed by specialist, % | With age-appropriate dose recommendations in prescribing guide, % |
|             | n (% total)                      |                             | n (% total)                      |                             |                                                                   |
| <2 years    | 1854.2 (91.1)                    | 2.7                         | 181.3 (8.9)                      | 12.6                        | 78.0                                                              |
| 2-5 years   | 1959.4 (95.1)                    | 3.4                         | 101.1 (4.9)                      | 21.6                        | 59.6                                                              |
| 6-11 years  | 1608.4 (91.8)                    | 8.8                         | 142.8 (8.2)                      | 36.7                        | 85.7                                                              |
| 12-17 years | 1738.2 (78.4)                    | 13.1                        | 478.5 (21.6)                     | 18.9                        | 59.6                                                              |
| All ages    | 1759.4 (87.8)                    | 7.5                         | 244.4 (12.2)                     | 21.7                        | 66.3                                                              |

On-label = age-appropriate dose recommendations in product information; Off-label = no age-appropriate dose recommendations in Product Information

**eTable 6.** Indications and dose recommendation for commonly dispensed off-label medicines listed in Table 4

| WHO ATC code | Medicine name and route of administration           | Primary indications                                     | Age and/or weight range for dose recommendations based on AMH CDC |           |          |
|--------------|-----------------------------------------------------|---------------------------------------------------------|-------------------------------------------------------------------|-----------|----------|
|              |                                                     |                                                         | None                                                              | Off-label | On-label |
| A02BA02      | ranitidine (oral)                                   | gastro-oesophageal reflux disease                       | <6 mos                                                            | ≥6 mos    | --       |
| A02BC01      | omeprazole (oral)                                   | gastro-oesophageal reflux disease                       | <1 yr                                                             | --        | ≥1 yr    |
| A02BC02      | pantoprazole (oral)                                 | gastro-oesophageal reflux disease                       | <5 yrs                                                            | --        | ≥5 yrs   |
| A02BC03      | lansoprazole (oral)                                 | gastro-oesophageal reflux disease                       | <1 yr                                                             | ≥1 yr     | --       |
| A02BC04      | rabeprazole (oral)                                  | gastro-oesophageal reflux disease                       | All ages                                                          | --        | --       |
| A04AA01      | ondansetron (oral)                                  | nausea/vomiting, gastroenteritis                        | <6 mos                                                            | 6-23 mos  | ≥2 yrs   |
| A07EA02      | hydrocortisone acetate (topical)                    | mild inflammatory skin conditions                       | <2 yrs                                                            | ≥2 yrs    | --       |
| C01CA24      | epinephrine (auto-injector)                         | anaphylaxis                                             | --                                                                | <15 kg    | ≥15 kg   |
| C02AC01      | clonidine (oral)                                    | attention deficit hyperactivity disorder, hypertension  | <1 yr                                                             | ≥1 yr     | --       |
| C07AA06      | timolol (eye drops)                                 | ocular hypertension                                     | --                                                                | All ages  | --       |
| C09AA04      | perindopril (oral)                                  | hypertension                                            | All ages                                                          | --        | --       |
| C09AA05      | ramipril (oral)                                     | hypertension                                            | All ages                                                          | --        | --       |
| D05AC52      | calcipotriol + betamethasone dipropionate (topical) | psoriasis                                               | All ages                                                          | --        | --       |
| D07AA01      | methylprednisolone (topical)                        | eczema, psoriasis                                       | <4 mos                                                            | --        | ≥4 mos   |
| G03AA05      | norethisterone + ethinylestradiol (oral)            | contraception, endometriosis, acne, menstrual disorders | All ages                                                          | --        | --       |
| G03AA07      | levonorgestrel + ethinylestradiol (oral)            | contraception, acne, menstrual disorders                | All ages                                                          | --        | --       |
| G03AC01      | norethisterone (oral)                               | contraception, endometriosis, menstrual disorders       | All ages                                                          | --        | --       |
| G03AC06      | medroxyprogesterone (intravenous)                   | contraception, menstrual disorders                      | All ages                                                          | --        | --       |
| G04BD04      | oxybutynin (patch)                                  | incontinence                                            | <12 yrs                                                           | ≥12 yrs   |          |
| H02AB09      | hydrocortisone (oral)                               | inflammation or immunosuppression                       | --                                                                | All ages  | --       |
| J01AA08      | minocycline (oral)                                  | bacterial infections, acne                              | <8 yrs                                                            | ≥8 yrs    | --       |
| J01FA06      | roxithromycin (oral)                                | bacterial infections                                    | <6 kg                                                             | --        | ≥6 kg    |
| J01FA10      | azithromycin (oral)                                 | bacterial infections, pertussis                         | --                                                                | <1 yr     | ≥1 yr    |
| M01AB05      | diclofenac (oral)                                   | pain, inflammation                                      | <1 yr                                                             | ≥1 yr     | --       |
| M01AC06      | meloxicam (oral)                                    | inflammatory pain                                       | All ages                                                          | --        | --       |
| N02AA05      | oxycodone (oral)                                    | pain                                                    |                                                                   | <12 yrs   | ≥12 yrs  |
| N02AJ06      | paracetamol/codeine (oral)                          | pain                                                    | <12 yrs                                                           | --        | ≥12 yrs  |
| N03AX11      | topiramate (oral)                                   | epilepsy                                                | <2 yrs                                                            | --        | ≥2 yrs   |

|         |                                               |                                                                                     |          |          |         |
|---------|-----------------------------------------------|-------------------------------------------------------------------------------------|----------|----------|---------|
| N03AX14 | levetiracetam (oral)                          | epilepsy                                                                            | <12 yrs  | ≥12 yrs  | --      |
| N05AH03 | olanzapine (oral)                             | schizophrenia, bipolar disorder, behaviour disturbance                              | <13 yrs  | ≥13 yrs  | --      |
| N05AX08 | risperidone (oral)                            | conduct disorders, behaviour disturbance in autism, schizophrenia, bipolar disorder | <5 yrs   | 5-14 yrs | ≥15 yrs |
| N06AA02 | imipramine (oral)                             | major depression                                                                    | All ages | --       | --      |
| N06AA09 | amitriptyline (oral)                          | neuropathic pain, migraine                                                          | <2 yrs   | ≥2 yrs   |         |
| N06AB03 | fluoxetine (oral)                             | major depression, obsessive-compulsive disorder                                     | <7 yrs   | ≥7 yrs   | --      |
| N06AB04 | citalopram (oral)                             | major depression                                                                    | <12 yrs  | ≥12 yrs  | --      |
| N06AB10 | escitalopram (oral)                           | major depression                                                                    | <12 yrs  | ≥12 yrs  | --      |
| N06AX11 | mirtazapine (oral)                            | major depression                                                                    | All ages | --       | --      |
| N06AX16 | venlafaxine (oral)                            | major depression, generalised anxiety disorder, panic disorder                      | All ages | --       | --      |
| N06AX21 | duloxetine (oral)                             | major depression, generalised anxiety disorder, neuropathy                          | All ages | --       | --      |
| N06AX23 | desvenlafaxine (oral)                         | major depression                                                                    | All ages | --       | --      |
| N06BA02 | dexamfetamine (oral)                          | attention deficit hyperactivity disorder                                            | <6 yrs   | --       | ≥6 yrs  |
| N06BA04 | methylphenidate (oral)                        | attention deficit hyperactivity disorder                                            | <6 yrs   | --       | ≥6 yrs  |
| R03AC02 | salbutamol (inhaled)                          | asthma                                                                              | --       | <6 mos   | ≥6 mos  |
| R03AK06 | fluticasone propionate + salmeterol (inhaled) | asthma                                                                              | <6 yrs   | --       | ≥6 yrs  |
| R03AK07 | budesonide + formoterol (inhaled)             | asthma                                                                              | <6 yrs   | 6-12 yrs | ≥12 yrs |
| R03BA01 | beclomethasone (inhaled)                      | asthma, allergic rhinitis                                                           | <5 yrs   | --       | ≥5 yrs  |
| R03BA05 | fluticasone propionate (inhaled)              | asthma                                                                              | <1 yr    | --       | ≥1 yr   |
| R03BA08 | ciclesonide (inhaled)                         | asthma, allergic rhinitis                                                           | <6 yrs   | --       | ≥6 yrs  |
| R03BB01 | ipratropium (inhaled)                         | asthma                                                                              | <6 mos   | ≥6 mos   | --      |
| R03CC02 | salbutamol (oral liquid)                      | asthma                                                                              | All ages | --       |         |
| S01AA07 | framycetin sulfate (eye drops)                | bacterial conjunctivitis                                                            | --       | All ages | --      |
| S01BA01 | dexamethasone (eye drops)                     | allergic and inflammatory eye conditions                                            | <2 yrs   | ≥2 yrs   | --      |
| S01BA07 | fluorometholone (eye drops)                   | inflammatory eye conditions                                                         | <2 yrs   | ≥2 yrs   | --      |

AMH CDC = Australian Medicines Handbook Children's Dosing Companion; WHO ATC = World Health Organisation Anatomic Therapeutic Chemical

**eTable 7.** On- and off-label dispensing rate by World Health Organisation Anatomic Therapeutic Chemical anatomic group and age, 2013-17

|                                                                     | <1 year                              |                  | 1-5 years                            |                  | 6-11 years                           |                  | 12-17 years                          |                  |
|---------------------------------------------------------------------|--------------------------------------|------------------|--------------------------------------|------------------|--------------------------------------|------------------|--------------------------------------|------------------|
|                                                                     | Dispensing rate per 1000 child-years | % of dispensings | Dispensing rate per 1000 child-years | % of dispensings | Dispensing rate per 1000 child-years | % of dispensings | Dispensing rate per 1000 child-years | % of dispensings |
| <b>All medicines</b>                                                |                                      |                  |                                      |                  |                                      |                  |                                      |                  |
| <i>On-label</i>                                                     | 1253.4                               | 84.5             | 2058.1                               | 95.0             | 1608.4                               | 91.8             | 1738.2                               | 78.4             |
| <i>Off-label</i>                                                    | 230.0                                | 15.5             | 107.5                                | 5.0              | 142.8                                | 8.2              | 478.5                                | 21.6             |
| <b>A – Alimentary tract</b>                                         |                                      |                  |                                      |                  |                                      |                  |                                      |                  |
| A01A – Stomatological preparations                                  |                                      |                  |                                      |                  |                                      |                  |                                      |                  |
| <i>On-label</i>                                                     | 15.4                                 | 100.0            | 3.2                                  | 99.9             | 1.0                                  | 97.4             | 1.5                                  | 94.0             |
| <i>Off-label</i>                                                    | 0.0                                  | 0.0              | <0.1                                 | 0.1              | <0.1                                 | 2.6              | 0.1                                  | 6.0              |
| A02B – Drugs for peptic ulcer and gastro-oesophageal reflux disease |                                      |                  |                                      |                  |                                      |                  |                                      |                  |
| <i>On-label</i>                                                     | 1.3                                  | 1.5              | 9.8                                  | 76.6             | 15.4                                 | 83.5             | 35.0                                 | 82.4             |
| <i>Off-label</i>                                                    | 82.0                                 | 98.5             | 3.0                                  | 23.4             | 3.1                                  | 16.5             | 7.5                                  | 17.6             |
| A03F – Propulsives                                                  |                                      |                  |                                      |                  |                                      |                  |                                      |                  |
| <i>On-label</i>                                                     | 0.4                                  | 100.0            | 0.4                                  | 66.1             | 1.5                                  | 79.4             | 12.8                                 | 88.6             |
| <i>Off-label</i>                                                    | 0.0                                  | 0.0              | 0.2                                  | 33.9             | 0.4                                  | 88.6             | 1.6                                  | 11.4             |
| A04A – Antiemetics and antinauseants                                |                                      |                  |                                      |                  |                                      |                  |                                      |                  |
| <i>On-label</i>                                                     | 3.8                                  | 100.0            | 11.8                                 | 81.8             | 11.1                                 | 99.8             | 11.7                                 | 97.4             |
| <i>Off-label</i>                                                    | 0.0                                  | 0.0              | 2.6                                  | 18.2             | <0.1                                 | 0.2              | 0.3                                  | 2.6              |
| A06A – Drugs for constipation                                       |                                      |                  |                                      |                  |                                      |                  |                                      |                  |
| <i>On-label</i>                                                     | 2.3                                  | 78.3             | 5.4                                  | 91.9             | 8.7                                  | 99.8             | 7.1                                  | 97.0             |
| <i>Off-label</i>                                                    | 0.6                                  | 21.7             | 0.5                                  | 8.1              | <0.1                                 | 0.2              | 0.2                                  | 3.0              |
| A10A – Insulins and analogues                                       |                                      |                  |                                      |                  |                                      |                  |                                      |                  |
| <i>On-label</i>                                                     | <0.1                                 | 38.5             | 1.1                                  | 85.2             | 5.5                                  | 96.4             | 15.5                                 | 95.3             |
| <i>Off-label</i>                                                    | <0.1                                 | 61.5             | 0.2                                  | 14.8             | 0.2                                  | 3.6              | 0.8                                  | 4.7              |
| <b>B – Blood</b>                                                    |                                      |                  |                                      |                  |                                      |                  |                                      |                  |
| B03A – Iron preparations                                            |                                      |                  |                                      |                  |                                      |                  |                                      |                  |
| <i>On-label</i>                                                     | 3.4                                  | 99.6             | 5.1                                  | 99.3             | 2.5                                  | 97.6             | 3.8                                  | 71.0             |
| <i>Off-label</i>                                                    | <0.1                                 | 0.4              | <0.1                                 | 0.7              | 0.1                                  | 2.4              | 1.5                                  | 29.0             |
| <b>C – Cardiovascular System</b>                                    |                                      |                  |                                      |                  |                                      |                  |                                      |                  |
| C01C – Cardiac stimulants excluding cardiac glycosides              |                                      |                  |                                      |                  |                                      |                  |                                      |                  |
| <i>On-label</i>                                                     | 2.7                                  | 100.0            | 10.0                                 | 86.5             | 15.2                                 | 99.9             | 10.3                                 | 99.9             |
| <i>Off-label</i>                                                    | 0.0                                  | 0.0              | 1.5                                  | 13.5             | <0.1                                 | 0.1              | <0.1                                 | 0.1              |
| C02A – Antiadrenergic agents, centrally acting                      |                                      |                  |                                      |                  |                                      |                  |                                      |                  |
| <i>On-label</i>                                                     | 0.0                                  | 0.0              | 0.0                                  | 0.0              | 0.0                                  | 0.0              | 0.0                                  | 0.0              |
| <i>Off-label</i>                                                    | 0.1                                  | 100.0            | 3.1                                  | 100.0            | 23.0                                 | 100.0            | 18.6                                 | 100.0            |

|                                                        | <1 year                              |                  | 1-5 years                            |                  | 6-11 years                           |                  | 12-17 years                          |                  |
|--------------------------------------------------------|--------------------------------------|------------------|--------------------------------------|------------------|--------------------------------------|------------------|--------------------------------------|------------------|
|                                                        | Dispensing rate per 1000 child-years | % of dispensings | Dispensing rate per 1000 child-years | % of dispensings | Dispensing rate per 1000 child-years | % of dispensings | Dispensing rate per 1000 child-years | % of dispensings |
| <b>C07A – Beta blocking agents</b>                     |                                      |                  |                                      |                  |                                      |                  |                                      |                  |
| <i>On-label</i>                                        | 0.8                                  | 55.8             | 0.3                                  | 27.2             | 0.9                                  | 42.0             | 4.4                                  | 58.8             |
| <i>Off-label</i>                                       | 0.6                                  | 44.2             | 0.7                                  | 72.8             | 1.3                                  | 58.0             | 3.1                                  | 41.2             |
| <b>D – Dermatologicals</b>                             |                                      |                  |                                      |                  |                                      |                  |                                      |                  |
| <b>D06B – Chemotherapeutics for topical use</b>        |                                      |                  |                                      |                  |                                      |                  |                                      |                  |
| <i>On-label</i>                                        | 1.1                                  | 100.0            | 1.7                                  | 100.0            | 1.3                                  | 100.0            | 1.8                                  | 100.0            |
| <i>Off-label</i>                                       | 0.0                                  | 0.0              | 0.0                                  | 0.0              | 0.0                                  | 0.0              | 0.0                                  | 0.0              |
| <b>D07A – Corticosteroids, plain</b>                   |                                      |                  |                                      |                  |                                      |                  |                                      |                  |
| <i>On-label</i>                                        | 109.7                                | 57.2             | 106.9                                | 78.4             | 67.4                                 | 85.5             | 68.6                                 | 89.3             |
| <i>Off-label</i>                                       | 82.0                                 | 42.8             | 29.4                                 | 21.6             | 11.4                                 | 14.5             | 8.2                                  | 19.4             |
| <b>D10A – Anti-acne preparations for topical use</b>   |                                      |                  |                                      |                  |                                      |                  |                                      |                  |
| <i>On-label</i>                                        | 0.0                                  | 0.0              | 0.0                                  | 0.0              | 0.0                                  | 0.0              | 40.1                                 | 100.0            |
| <i>Off-label</i>                                       | <0.1                                 | 100.0            | 0.1                                  | 100.0            | 1.0                                  | 100.0            | 0.0                                  | 0.0              |
| <b>D10B – Anti-acne preparations for systemic use</b>  |                                      |                  |                                      |                  |                                      |                  |                                      |                  |
| <i>On-label</i>                                        | 0.0                                  | 0.0              | 0.0                                  | 0.0              | 0.0                                  | 0.0              | 41.1                                 | 100.0            |
| <i>Off-label</i>                                       | <0.1                                 | 100.0            | <0.1                                 | 100.0            | 0.2                                  | 100.0            | 0.0                                  | 0.0              |
| <b>D11A – Other dermatological preparations</b>        |                                      |                  |                                      |                  |                                      |                  |                                      |                  |
| <i>On-label</i>                                        | 109.7                                | 57.2             | 106.9                                | 78.4             | 67.4                                 | 85.5             | 68.6                                 | 89.3             |
| <i>Off-label</i>                                       | 82.0                                 | 42.8             | 29.4                                 | 21.6             | 11.4                                 | 14.5             | 8.2                                  | 10.7             |
| <b>G – Genitourinary And Sex Hormones</b>              |                                      |                  |                                      |                  |                                      |                  |                                      |                  |
| <b>G03A – Hormonal contraceptives for systemic use</b> |                                      |                  |                                      |                  |                                      |                  |                                      |                  |
| <i>On-label</i>                                        | 0.0                                  | 13.2             | 0.0                                  | 4.4              | 0.0                                  | 4.0              | 9.6                                  | 7.6              |
| <i>Off-label</i>                                       | 0.1                                  | 86.8             | 0.2                                  | 95.6             | 0.5                                  | 96.0             | 115.8                                | 92.4             |
| <b>H – Systemic Hormones</b>                           |                                      |                  |                                      |                  |                                      |                  |                                      |                  |
| <b>H01B – Posterior pituitary lobe hormones</b>        |                                      |                  |                                      |                  |                                      |                  |                                      |                  |
| <i>On-label</i>                                        | 0.1                                  | 100.0            | 0.2                                  | 100.0            | 0.7                                  | 99.8             | 0.6                                  | 98.2             |
| <i>Off-label</i>                                       | 0.0                                  | 0.0              | 0.0                                  | 0.0              | 0.0                                  | 0.2              | 0.0                                  | 1.8              |
| <b>H02A – Corticosteroids for systemic use, plain</b>  |                                      |                  |                                      |                  |                                      |                  |                                      |                  |
| <i>On-label</i>                                        | 160.6                                | 99.7             | 240.6                                | 99.2             | 104.5                                | 97.6             | 43.4                                 | 92.0             |
| <i>Off-label</i>                                       | 0.5                                  | 0.3              | 2.0                                  | 0.8              | 2.5                                  | 2.4              | 3.8                                  | 8.0              |
| <b>H03A – Thyroid preparations</b>                     |                                      |                  |                                      |                  |                                      |                  |                                      |                  |
| <i>On-label</i>                                        | 1.0                                  | 98.7             | 1.2                                  | 99.9             | 1.9                                  | 100.0            | 4.3                                  | 99.7             |
| <i>Off-label</i>                                       | 0.0                                  | 1.3              | 0.0                                  | 0.1              | 0.0                                  | 0.0              | 0.0                                  | 0.3              |

|                                                                  | <1 year                              |                  | 1-5 years                            |                  | 6-11 years                           |                  | 12-17 years                          |                  |
|------------------------------------------------------------------|--------------------------------------|------------------|--------------------------------------|------------------|--------------------------------------|------------------|--------------------------------------|------------------|
|                                                                  | Dispensing rate per 1000 child-years | % of dispensings | Dispensing rate per 1000 child-years | % of dispensings | Dispensing rate per 1000 child-years | % of dispensings | Dispensing rate per 1000 child-years | % of dispensings |
| H04A – Glycogenolytic hormones                                   |                                      |                  |                                      |                  |                                      |                  |                                      |                  |
| <i>On-label</i>                                                  | 0.1                                  | 100.0            | 0.5                                  | 100.0            | 1.7                                  | 100.0            | 3.2                                  | 100.0            |
| <i>Off-label</i>                                                 | 0.0                                  | 0.0              | 0.0                                  | 0.0              | 0.0                                  | 0.0              | 0.0                                  | 0.0              |
| <b>J – Systemic Antiinfectives</b>                               |                                      |                  |                                      |                  |                                      |                  |                                      |                  |
| J01A – Tetracyclines                                             |                                      |                  |                                      |                  |                                      |                  |                                      |                  |
| <i>On-label</i>                                                  | 0.0                                  | 0.0              | 0.0                                  | 0.0              | 1.9                                  | 80.0             | 119.7                                | 72.7             |
| <i>Off-label</i>                                                 | 0.1                                  | 100.0            | 0.2                                  | 100.0            | 0.5                                  | 20.0             | 45                                   | 27.3             |
| J01C – Beta-lactam antibacterials, penicillins                   |                                      |                  |                                      |                  |                                      |                  |                                      |                  |
| <i>On-label</i>                                                  | 573                                  | 100.0            | 843.1                                | 100.0            | 436.9                                | 99.8             | 335.4                                | 100              |
| <i>Off-label</i>                                                 | 0.0                                  | 0.0              | 0.0                                  | 0.0              | 1.0                                  | 0.2              | 0.1                                  | 0.0              |
| J01D – Other beta-lactam antibacterials                          |                                      |                  |                                      |                  |                                      |                  |                                      |                  |
| <i>On-label</i>                                                  | 129                                  | 100.0            | 275.4                                | 100.0            | 188.1                                | 100.0            | 164.8                                | 100              |
| <i>Off-label</i>                                                 | 0.0                                  | 0.0              | 0.0                                  | 0.0              | 0.0                                  | 0.0              | 0.0                                  | 0.0              |
| J01E – Sulfonamides and trimethoprim                             |                                      |                  |                                      |                  |                                      |                  |                                      |                  |
| <i>On-label</i>                                                  | 23.7                                 | 99.9             | 35.2                                 | 99.7             | 20.9                                 | 100.0            | 23.5                                 | 100.0            |
| <i>Off-label</i>                                                 | 0.0                                  | 0.1              | 0.1                                  | 0.3              | 0.0                                  | 0.0              | 0.0                                  | 0.0              |
| J01F – Macolides, lincosamides and streptogramins                |                                      |                  |                                      |                  |                                      |                  |                                      |                  |
| <i>On-label</i>                                                  | 48.8                                 | 84.2             | 118.6                                | 100.0            | 80.8                                 | 100.0            | 99.3                                 | 100.0            |
| <i>Off-label</i>                                                 | 9.2                                  | 15.8             | 0.0                                  | 0.0              | 0.0                                  | 0.0              | 0.0                                  | 0.0              |
| J01X – Other antibacterials                                      |                                      |                  |                                      |                  |                                      |                  |                                      |                  |
| <i>On-label</i>                                                  | 2.9                                  | 100.0            | 9.4                                  | 99.8             | 9.3                                  | 99.6             | 12.2                                 | 98.9             |
| <i>Off-label</i>                                                 | 0.0                                  | 100.0            | 0.0                                  | 0.2              | 0.0                                  | 0.4              | 0.1                                  | 1.1              |
| J05A – Direct acting antivirals                                  |                                      |                  |                                      |                  |                                      |                  |                                      |                  |
| <i>On-label</i>                                                  | 0.0                                  | 25.0             | 0.2                                  | 74.8             | 0.5                                  | 44.9             | 3.2                                  | 95.2             |
| <i>Off-label</i>                                                 | 0.1                                  | 75.0             | 0.1                                  | 25.2             | 0.6                                  | 55.1             | 0.2                                  | 4.8              |
| <b>M – Musculoskeletal</b>                                       |                                      |                  |                                      |                  |                                      |                  |                                      |                  |
| M01A – Antiinflammatory and antirheumatic products, non-steroids |                                      |                  |                                      |                  |                                      |                  |                                      |                  |
| <i>On-label</i>                                                  | 0.0                                  | 23.3             | 0.1                                  | 14.1             | 1.1                                  | 41.4             | 21.1                                 | 59.9             |
| <i>Off-label</i>                                                 | 0.1                                  | 76.7             | 0.7                                  | 85.9             | 1.6                                  | 58.6             | 14.1                                 | 40.1             |
| <b>N – Nervous System</b>                                        |                                      |                  |                                      |                  |                                      |                  |                                      |                  |
| N02A – Opioids                                                   |                                      |                  |                                      |                  |                                      |                  |                                      |                  |
| <i>On-label</i>                                                  | 0.1                                  | 12.1             | 0.2                                  | 6.7              | 0.1                                  | 3.0              | 48                                   | 94.5             |
| <i>Off-label</i>                                                 | 0.5                                  | 87.9             | 3.2                                  | 93.3             | 4.3                                  | 97               | 2.8                                  | 5.5              |

|                                                                      | <1 year                              |                  | 1-5 years                            |                  | 6-11 years                           |                  | 12-17 years                          |                  |
|----------------------------------------------------------------------|--------------------------------------|------------------|--------------------------------------|------------------|--------------------------------------|------------------|--------------------------------------|------------------|
|                                                                      | Dispensing rate per 1000 child-years | % of dispensings | Dispensing rate per 1000 child-years | % of dispensings | Dispensing rate per 1000 child-years | % of dispensings | Dispensing rate per 1000 child-years | % of dispensings |
| <b>N02B – Other analgesics and antipyretics</b>                      |                                      |                  |                                      |                  |                                      |                  |                                      |                  |
| <i>On-label</i>                                                      | 6.5                                  | 99.9             | 8.0                                  | 99.3             | 6.8                                  | 96.1             | 4.8                                  | 61.7             |
| <i>Off-label</i>                                                     | 0.0                                  | 0.1              | 0.1                                  | 0.7              | 0.3                                  | 3.9              | 3.0                                  | 38.3             |
| <b>N02C – Antimigraine preparations</b>                              |                                      |                  |                                      |                  |                                      |                  |                                      |                  |
| <i>On-label</i>                                                      | 0.0                                  | 0.0              | 0.3                                  | 67               | 0.9                                  | 48.1             | 2.0                                  | 18.3             |
| <i>Off-label</i>                                                     | 0.0                                  | 100.0            | 0.1                                  | 33               | 1.0                                  | 51.9             | 8.8                                  | 81.7             |
| <b>N03A – Antiepileptics</b>                                         |                                      |                  |                                      |                  |                                      |                  |                                      |                  |
| <i>On-label</i>                                                      | 1.2                                  | 29.2             | 14.2                                 | 78.9             | 34                                   | 85.7             | 53.4                                 | 98.4             |
| <i>Off-label</i>                                                     | 2.9                                  | 70.8             | 3.8                                  | 21.1             | 5.7                                  | 14.3             | 0.9                                  | 1.6              |
| <b>N05A – Antipsychotics</b>                                         |                                      |                  |                                      |                  |                                      |                  |                                      |                  |
| <i>On-label</i>                                                      | 0.0                                  | 0.0              | 0.0                                  | 0.1              | 0.1                                  | 0.4              | 18                                   | 44.1             |
| <i>Off-label</i>                                                     | 0.0                                  | 100.0            | 2.0                                  | 99.9             | 20.4                                 | 99.6             | 22.8                                 | 55.9             |
| <b>N05B – Anxiolytics</b>                                            |                                      |                  |                                      |                  |                                      |                  |                                      |                  |
| <i>On-label</i>                                                      | 0.1                                  | 72.2             | 0.4                                  | 95.3             | 1.1                                  | 94.7             | 5.2                                  | 87.7             |
| <i>Off-label</i>                                                     | 0.0                                  | 27.8             | 0.0                                  | 4.7              | 0.1                                  | 5.3              | 0.7                                  | 12.3             |
| <b>N06A – Antidepressants</b>                                        |                                      |                  |                                      |                  |                                      |                  |                                      |                  |
| <i>On-label</i>                                                      | 0                                    | 0.0              | 0                                    | 0.0              | 9.2                                  | 25.6             | 63.3                                 | 28.2             |
| <i>Off-label</i>                                                     | 0.2                                  | 100.0            | 2.1                                  | 100.0            | 26.9                                 | 74.4             | 161.6                                | 71.8             |
| <b>N06B – Psychostimulants, agents used for ADHD and nootropics</b>  |                                      |                  |                                      |                  |                                      |                  |                                      |                  |
| <i>On-label</i>                                                      | 0.0                                  | 0.0              | 0.0                                  | 0.0              | 181.3                                | 100.0            | 166.8                                | 99.9             |
| <i>Off-label</i>                                                     | 0.0                                  | 0.0              | 4.9                                  | 100.0            | 0.0                                  | 0.0              | 0.1                                  | 0.1              |
| <b>P – Antiparasitics</b>                                            |                                      |                  |                                      |                  |                                      |                  |                                      |                  |
| <b>P03A – Ectoparasiticides, including scabicides</b>                |                                      |                  |                                      |                  |                                      |                  |                                      |                  |
| <i>On-label</i>                                                      | 2.4                                  | 70.2             | 4.4                                  | 100.0            | 4.5                                  | 100.0            | 5.5                                  | 100.0            |
| <i>Off-label</i>                                                     | 1.0                                  | 29.8             | 0.0                                  | 0.0              | 0.0                                  | 0.0              | 0.0                                  | 0.0              |
| <b>R – Respiratory</b>                                               |                                      |                  |                                      |                  |                                      |                  |                                      |                  |
| <b>R03A – Adrenergics, inhalants</b>                                 |                                      |                  |                                      |                  |                                      |                  |                                      |                  |
| <i>On-label</i>                                                      | 30.9                                 | 84.0             | 106.3                                | 88.2             | 145.4                                | 96.6             | 142.3                                | 99.3             |
| <i>Off-label</i>                                                     | 5.9                                  | 16               | 14.2                                 | 11.8             | 5.2                                  | 3.4              | 1.1                                  | 0.7              |
| <b>R03B – Other drugs for obstructive airway diseases, inhalants</b> |                                      |                  |                                      |                  |                                      |                  |                                      |                  |
| <i>On-label</i>                                                      | 1.5                                  | 17.2             | 86.1                                 | 96.3             | 81.5                                 | 97.6             | 27.0                                 | 94.4             |
| <i>Off-label</i>                                                     | 7.2                                  | 82.8             | 3.3                                  | 3.7              | 2.0                                  | 2.4              | 1.6                                  | 5.6              |
| <b>R03C – Adrenergics for systemic use</b>                           |                                      |                  |                                      |                  |                                      |                  |                                      |                  |
| <i>On-label</i>                                                      | 0.0                                  | 0.0              | 0.0                                  | 0.0              | 0.0                                  | 0.0              | 0.0                                  | 0.0              |
| <i>Off-label</i>                                                     | 5.8                                  | 100.0            | 6.8                                  | 100.0            | 1.8                                  | 100.0            | 0.5                                  | 100.0            |



|                                                                     | <1 year                                     |                  | 1-5 years                                   |                  |                                             | 6-11 years       |      |       |
|---------------------------------------------------------------------|---------------------------------------------|------------------|---------------------------------------------|------------------|---------------------------------------------|------------------|------|-------|
|                                                                     | Dispensing rate<br>per 1000 child-<br>years | % of dispensings | Dispensing rate<br>per 1000 child-<br>years | % of dispensings | Dispensing rate<br>per 1000 child-<br>years | % of dispensings |      |       |
| R03D – Other systemic drugs for obstructive airway disease          |                                             |                  |                                             |                  |                                             |                  |      |       |
| <i>On-label</i>                                                     | 0.0                                         | 0.0              | 47.8                                        | 98.5             | 61.6                                        | 100.0            | 16.5 | 100.0 |
| <i>Off-label</i>                                                    | 0.2                                         | 100.0            | 0.7                                         | 1.5              | 0.0                                         | 0.0              | 0.0  | 0.0   |
| <b>S – Sensory Organs</b>                                           |                                             |                  |                                             |                  |                                             |                  |      |       |
| S01A – Ophthalmological antiinfectives                              |                                             |                  |                                             |                  |                                             |                  |      |       |
| <i>On-label</i>                                                     | 0.0                                         | 0.0              | 47.8                                        | 98.5             | 61.6                                        | 100.0            | 16.5 | 100.0 |
| <i>Off-label</i>                                                    | 0.2                                         | 100.0            | 0.7                                         | 1.5              | 0.0                                         | 0.0              | 0.0  | 0.0   |
| S01B – Ophthalmological antiinflammatory agents                     |                                             |                  |                                             |                  |                                             |                  |      |       |
| <i>On-label</i>                                                     | 0.0                                         | 0.0              | 0.0                                         | 0.0              | 0.0                                         | 0.0              | 0.0  | 0.0   |
| <i>Off-label</i>                                                    | 2.9                                         | 100.0            | 4.2                                         | 100.0            | 6.9                                         | 100.0            | 6.9  | 100   |
| S02A – Otological antiinfectives                                    |                                             |                  |                                             |                  |                                             |                  |      |       |
| <i>On-label</i>                                                     | 1.5                                         | 88               | 3.9                                         | 95.5             | 1.9                                         | 93.6             | 0.6  | 90.8  |
| <i>Off-label</i>                                                    | 0.2                                         | 12.0             | 0.2                                         | 4.5              | 0.1                                         | 6.4              | 0.1  | 9.2   |
| S02C – Otological corticosteroids and antiinfectives in combination |                                             |                  |                                             |                  |                                             |                  |      |       |
| <i>On-label</i>                                                     | 23.5                                        | 100.0            | 37.6                                        | 100.0            | 42.1                                        | 100.0            | 29.6 | 100.0 |
| <i>Off-label</i>                                                    | 0.0                                         | 0.0              | 0.0                                         | 0.0              | 0.0                                         | 0.0              | 0.0  | 0.0   |
| S03A – Ophthalmological and otological antiinfectives               |                                             |                  |                                             |                  |                                             |                  |      |       |
| <i>On-label</i>                                                     | 0.0                                         | 0.0              | 0.0                                         | 0.0              | 0.0                                         | 0.0              | 0.0  | 0.0   |
| <i>Off-label</i>                                                    | 10.4                                        | 100.0            | 6.0                                         | 100.0            | 2.4                                         | 100.0            | 1.5  | 100.0 |

## Supplemental Figures

**eFigure 1a:** Average yearly prevalence per 1000 children by age, sex and World Health Organisation Anatomic Therapeutic Chemical classification pharmacological subgroup, 2013-17

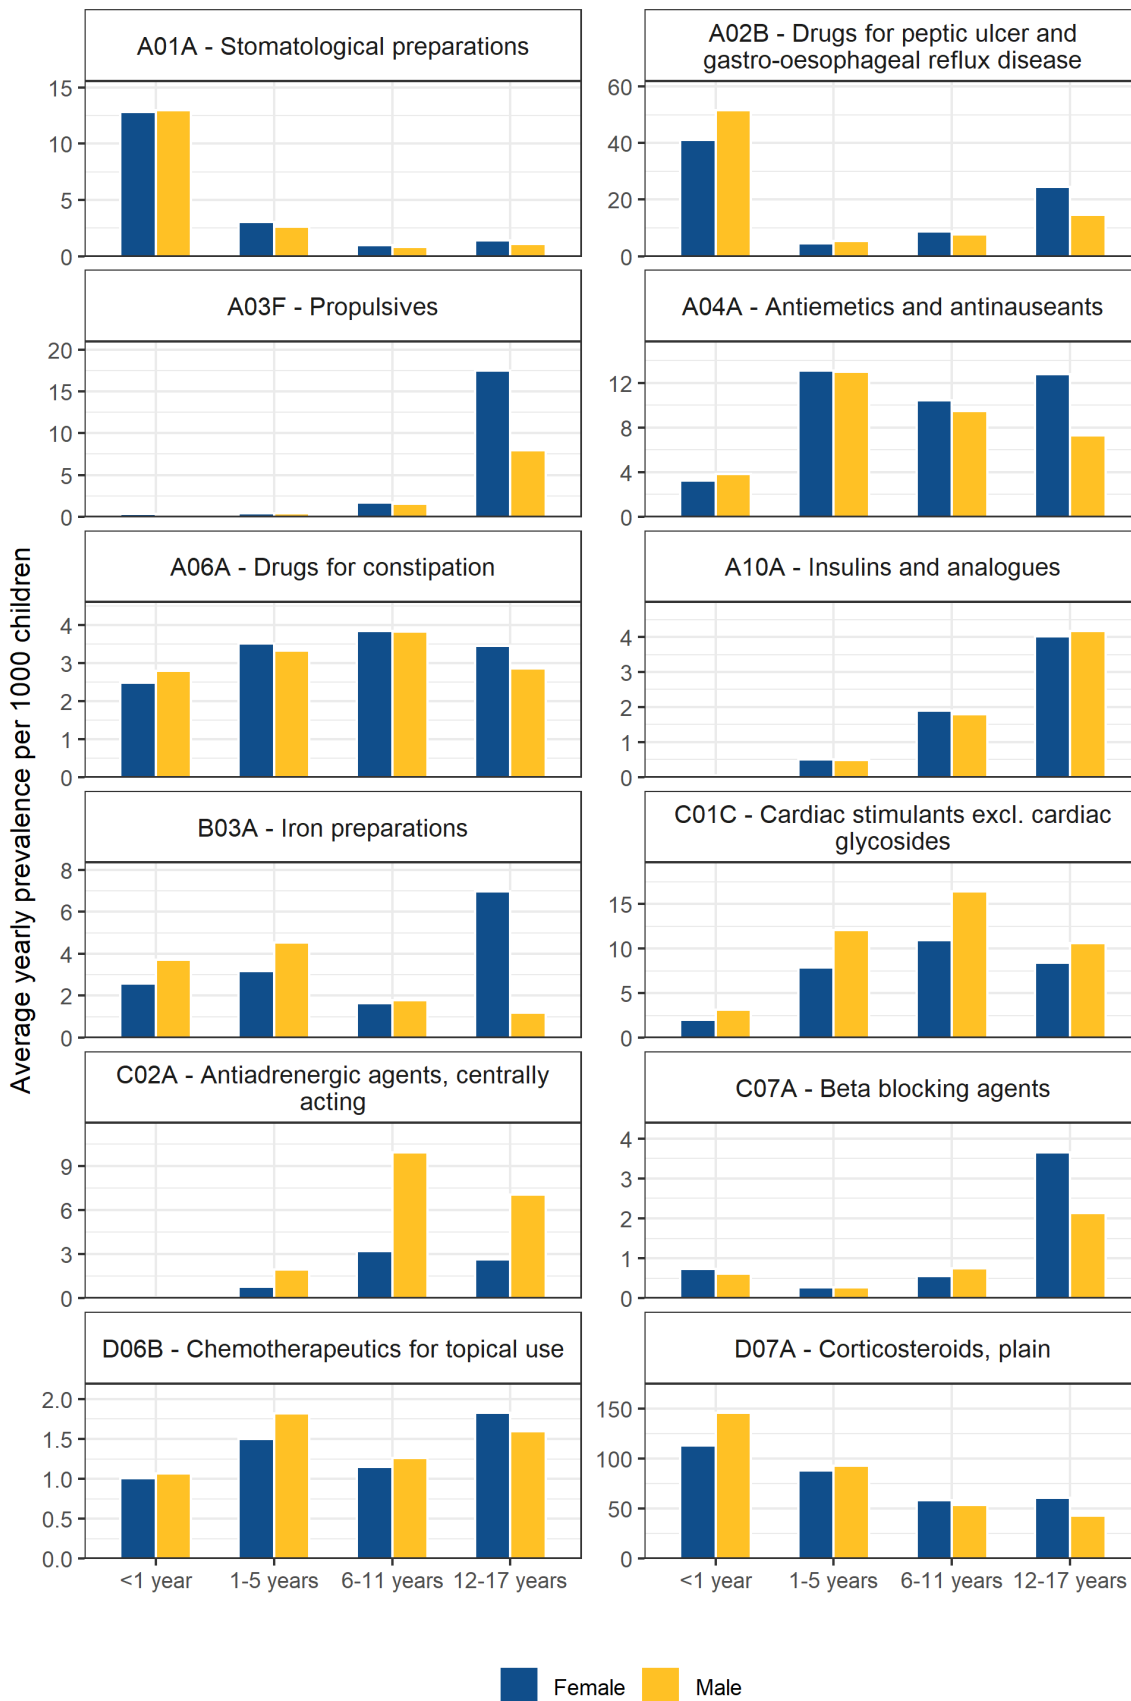

**eFigure 1b.** Average yearly prevalence per 1000 children by age, sex and World Health Organisation Anatomic Therapeutic Chemical classification pharmacological subgroup, 2013-17

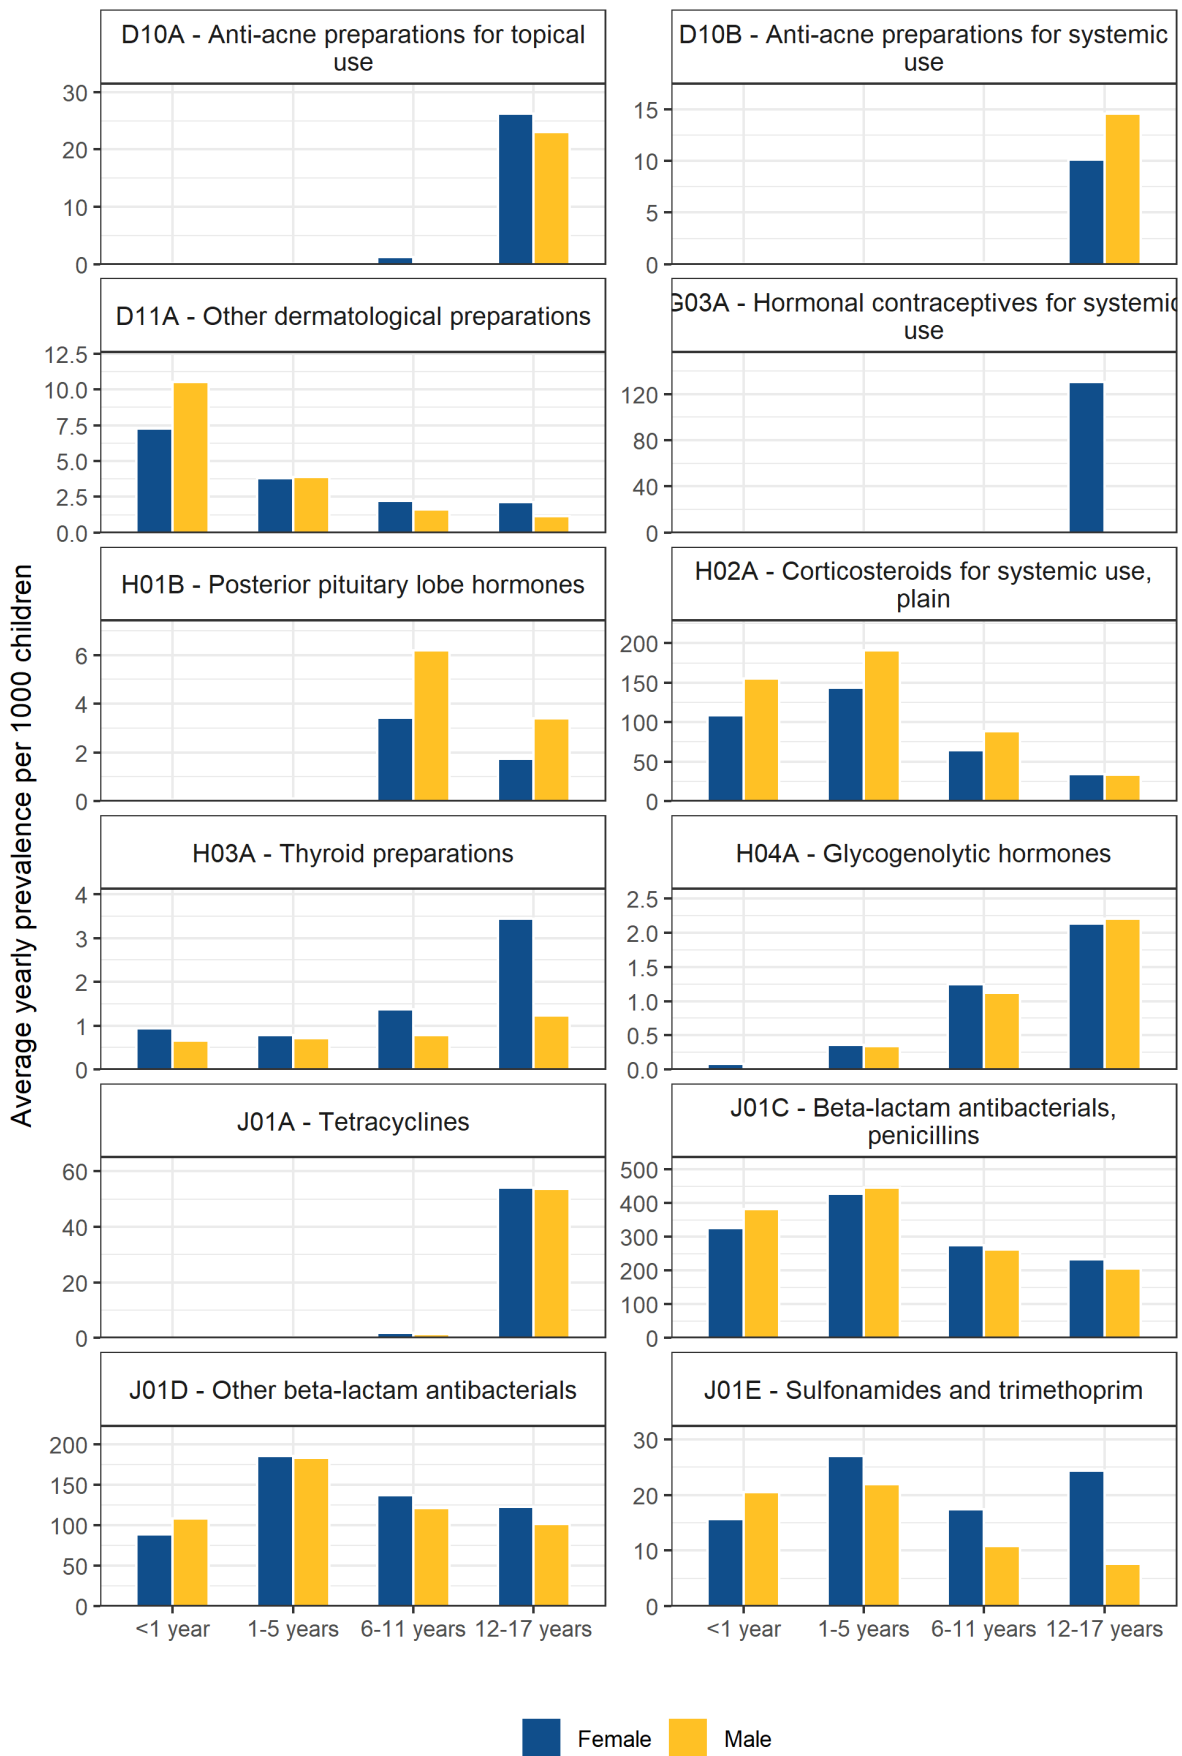

**eFigure 1c.** Average yearly prevalence per 1000 children by age, sex and World Health Organisation Anatomic Therapeutic Chemical classification pharmacological subgroup, 2013-17

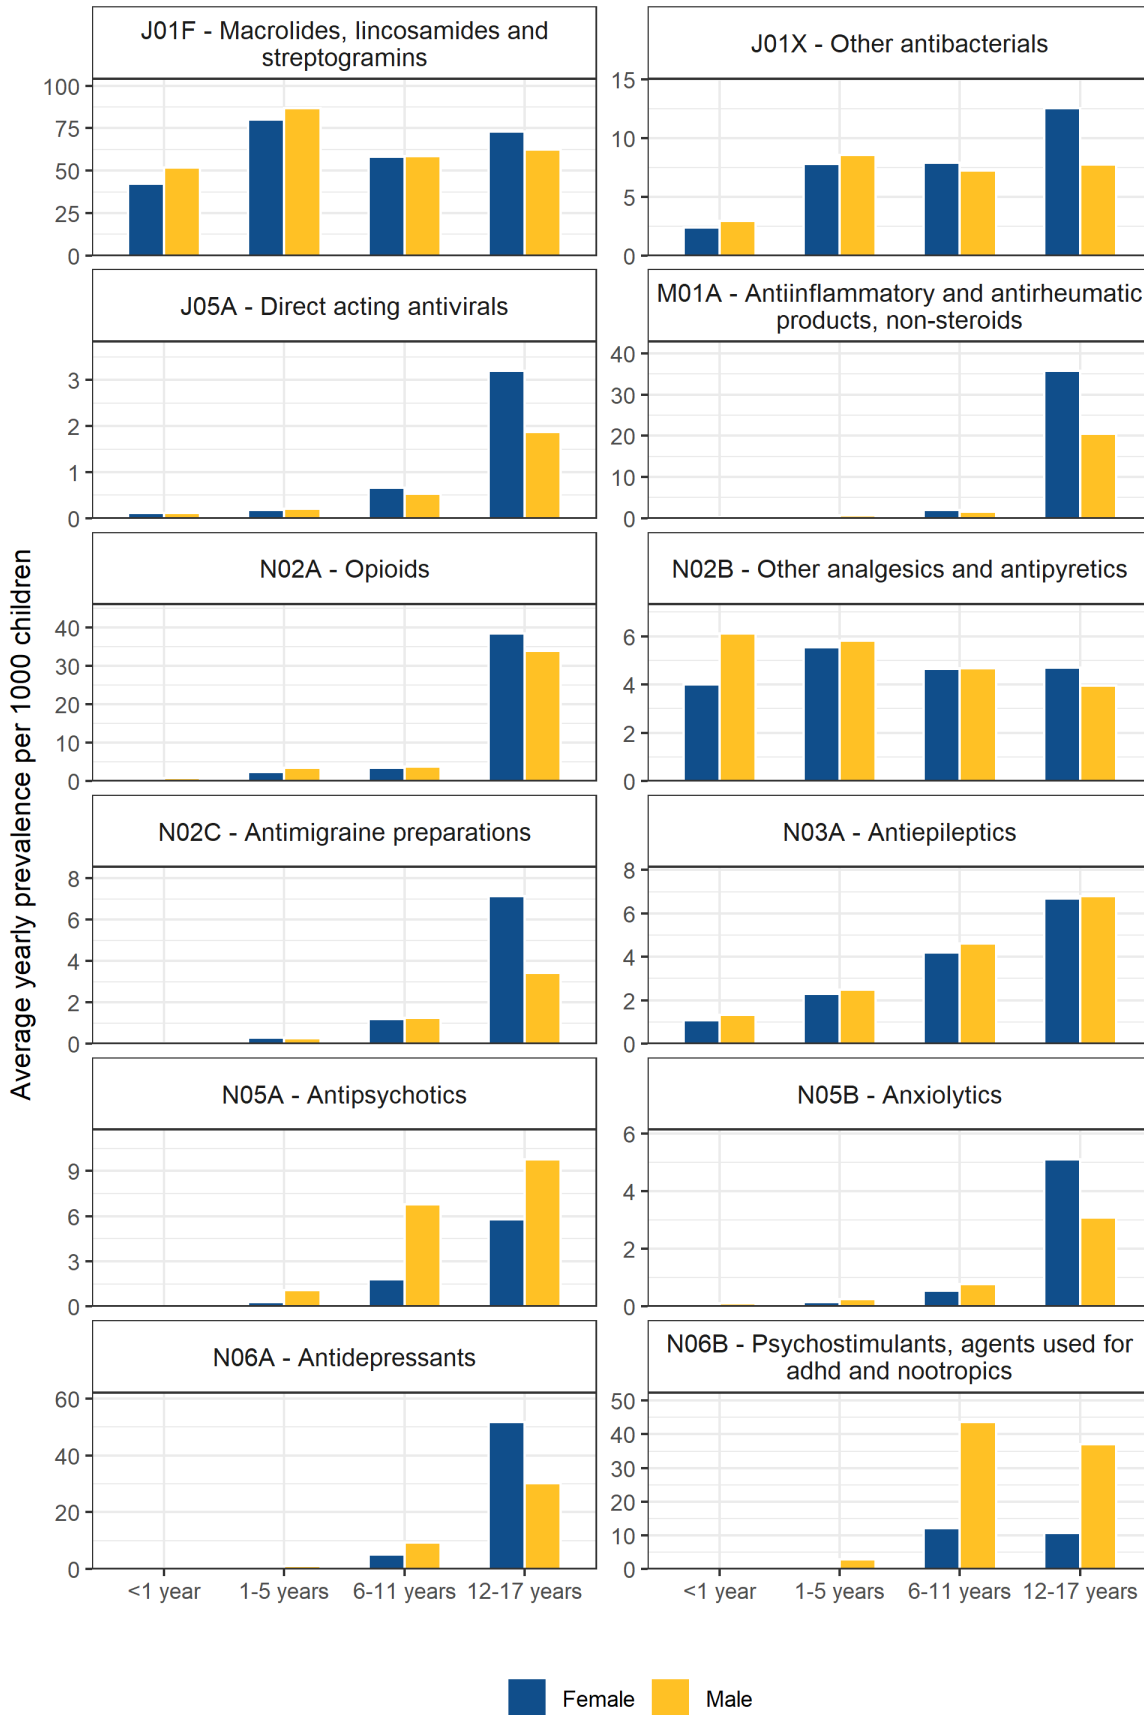

**eFigure 1d.** Average yearly prevalence per 1000 children by age, sex and World Health Organisation Anatomic Therapeutic Chemical classification pharmacological subgroup, 2013-17

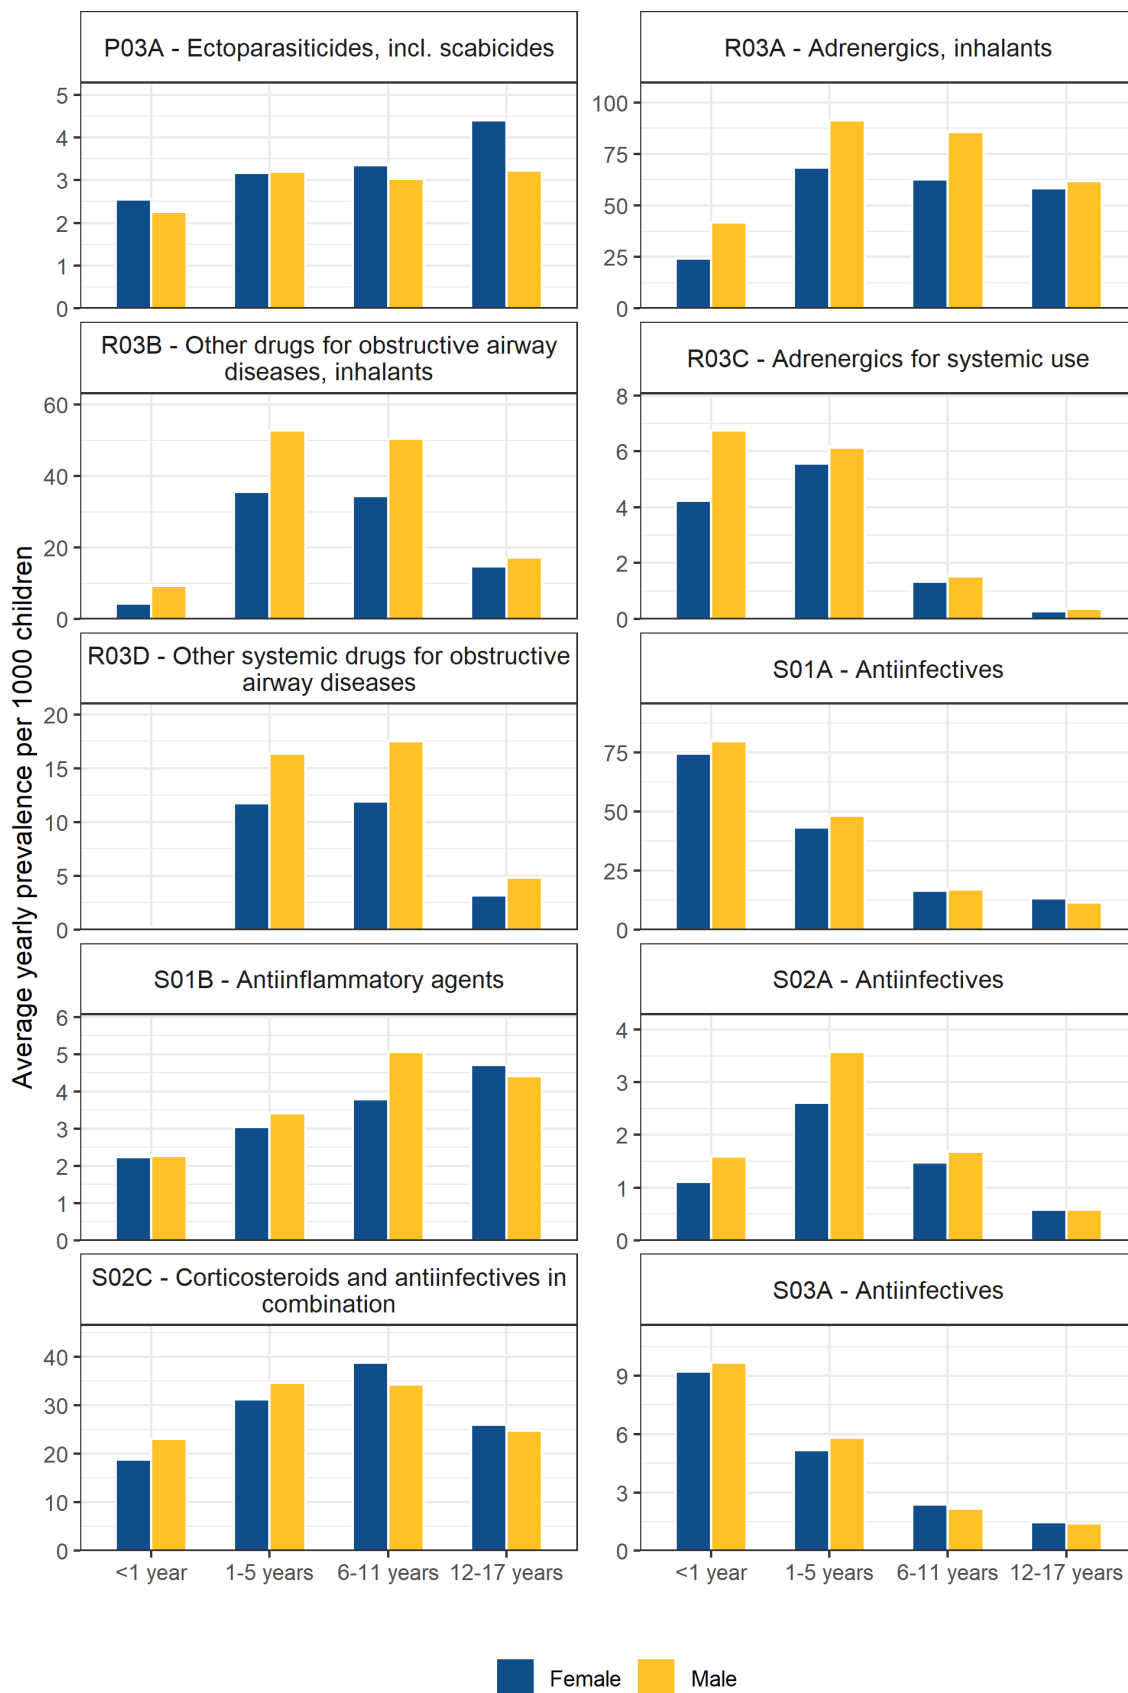

Supplement: PPE-36-726-s001.pdf [file PPE-36-726-s001.pdf]
